# Supplementary material for: Results of a pilot study using self-collected mid-turbinate nasal swabs for detection of influenza virus infection among pregnant women
Source: PubMed Central journal article supplement (PMC4415700; doi:10.1111/irv.12309), 2015-04-23
Supplement: irv0009-0155-sd1.pdf [file irv0009-0155-sd1.pdf]

Supplemental Table A. Cycle threshold (CT) from RT-PCR of four influenza viruses at six time periods of delay prior to testing and four storage temperatures with change in CT and percentage [%] change from baseline

| Time Delay      | Storage Temperature | A(H1N1)pdm09 Virus |           |          | A(H3N2) Virus |           |          | B/Victoria Virus |           |          | B/Yamagata |           |          |
|-----------------|---------------------|--------------------|-----------|----------|---------------|-----------|----------|------------------|-----------|----------|------------|-----------|----------|
|                 |                     | CT                 | CT Change | % Change | CT            | CT Change | % Change | CT               | CT Change | % Change | CT         | CT Change | % Change |
| Baseline (none) | -20°C               | 26.88              |           |          | 25.72         |           |          | 27.42            |           |          | 26.38      |           |          |
| 8 Hours         | 4°C                 | 26.57              | 0.31      | 1.15     | 24.95         | 0.77      | 2.99     | 26.94            | 0.48      | 1.75     | 26.75      | -0.37     | -1.40    |
|                 | 20°C                | 26.74              | 0.14      | 0.52     | 25.73         | -0.01     | -0.04    | 27.74            | -0.32     | -1.17    | 26.49      | -0.11     | -0.42    |
|                 | 27°C                | 26.77              | 0.11      | 0.41     | 25.88         | -0.16     | -0.62    | 27.26            | 0.16      | 0.58     | 26.81      | -0.43     | -1.63    |
|                 | 35°C                | 26.90              | -0.02     | -0.07    | 26.40         | -0.68     | -2.64    | 27.67            | -0.25     | -0.91    | 26.86      | -0.48     | -1.82    |
| 24 Hour         | 4°C                 | 26.70              | 0.18      | 0.67     | 25.93         | -0.21     | -0.82    | 26.60            | 0.82      | 2.99     | 26.38      | 0.00      | 0.00     |
|                 | 20°C                | 26.91              | -0.03     | -0.11    | 25.38         | 0.34      | 1.32     | 26.83            | 0.59      | 2.15     | 26.47      | -0.09     | -0.34    |
|                 | 27°C                | 26.73              | 0.15      | 0.56     | 25.62         | 0.10      | 0.39     | 27.57            | -0.15     | -0.55    | 26.85      | -0.47     | -1.78    |
|                 | 35°C                | 27.23              | -0.35     | -1.30    | 26.52         | -0.80     | -3.11    | 27.86            | -0.44     | -1.60    | 27.58      | -1.20     | -4.55    |
| 48 Hour         | 4°C                 | 26.76              | 0.12      | 0.45     | 25.94         | -0.22     | -0.86    | 26.91            | 0.51      | 1.86     | 26.17      | 0.21      | 0.80     |
|                 | 20°C                | 27.28              | -0.40     | -1.49    | 25.65         | 0.07      | 0.27     | 26.80            | 0.62      | 2.26     | 26.69      | -0.31     | -1.18    |
|                 | 27°C                | 26.91              | -0.03     | -0.11    | 25.74         | -0.02     | -0.08    | 27.99            | -0.57     | -2.08    | 27.35      | -0.97     | -3.68    |
|                 | 35°C                | 27.28              | -0.40     | -1.49    | 26.54         | -0.82     | -3.19    | 28.57            | -1.15     | -4.19    | 28.51      | -2.13     | -8.07    |
| 72 Hour         | 4°C                 | 27.68              | -0.80     | -2.98    | 25.77         | -0.05     | -0.19    | 26.98            | 0.44      | 1.60     | 26.40      | -0.02     | -0.08    |
|                 | 20°C                | 27.39              | -0.51     | -1.90    | 25.72         | 0.00      | 0.00     | 27.36            | 0.06      | 0.22     | 27.00      | -0.62     | -2.35    |
|                 | 27°C                | 27.53              | -0.65     | -2.42    | 26.45         | -0.73     | -2.84    | 28.84            | -1.42     | -5.18    | 27.61      | -1.23     | -4.66    |
|                 | 35°C                | 27.49              | -0.61     | -2.27    | 26.93         | -1.21     | -4.70    | 29.42            | -2.00     | -7.29    | 29.79      | -3.41     | -12.93   |
| 168 Hour        | 4°C                 | 26.59              | 0.29      | 1.08     | 26.32         | -0.60     | -2.33    | 27.23            | 0.19      | 0.69     | 26.65      | -0.27     | -1.02    |
|                 | 20°C                | 27.36              | -0.48     | -1.79    | 26.67         | -0.95     | -3.69    | 27.94            | -0.52     | -1.90    | 27.70      | -1.32     | -5.00    |
|                 | 27°C                | 27.93              | -1.05     | -3.91    | 26.69         | -0.97     | -3.77    | 29.77            | -2.35     | -8.57    | 28.91      | -2.53     | -9.59    |
|                 | 35°C                | 28.67              | -1.79     | -6.66    | 27.44         | -1.72     | -6.69    | 30.84            | -3.42     | -12.47   | 30.90      | -4.52     | -17.13   |
| 30 Days         | 4°C                 | 28.33              | -1.45     | -5.39    | 27.27         | -1.55     | -6.03    | 28.51            | -1.09     | -3.98    | 28.23      | -1.85     | -7.01    |
|                 | 20°C                | 29.40              | -2.52     | -9.38    | 27.95         | -2.23     | -8.67    | 31.91            | -4.49     | -16.37   | 30.82      | -4.44     | -16.83   |
|                 | 27°C                | 30.21              | -3.33     | -12.39   | 30.26         | -4.54     | -17.65   | 33.70            | -6.28     | -22.90   | 32.33      | -5.95     | -22.55   |
|                 | 35°C                | 33.34              | -6.46     | -24.03   | 33.42         | -7.70     | -29.94   | 36.89            | -9.47     | -34.54   | 34.41      | -8.03     | -30.44   |

CT Change: Baseline Temp CT - Experimental Temp CT

% Change: (Baseline Temp CT - Experimental Temp CT)/Baseline Temp CT\*100

Note: If the CP Change and % CP are negative values, the CP value INCREASED from the Baseline

Highlighted cells represent >1 absolute value CT change or a change of >5%.
