# Supplementary material for: Results of a pilot study using self-collected mid-turbinate nasal swabs for detection of influenza virus infection among pregnant women
Source: PubMed Central journal article supplement (PMC4415700; doi:10.1111/irv.12309), 2015-04-23
Supplement: irv0009-0155-sd2.pdf [file irv0009-0155-sd2.pdf]

Supplemental Table B. Cycle threshold (CT) from RT-PCR of Rnase P endogenous control gene, at six time periods of delay prior to testing and four storage temperatures with change in CT and percentage [%] change from baseline

| Time Delay      | Storage Temperature | A(H1N1)pdm09 Virus |           |          | A(H3N2) Virus |           |          | B/Victoria Virus |           |          | B/Yamagata |           |          |
|-----------------|---------------------|--------------------|-----------|----------|---------------|-----------|----------|------------------|-----------|----------|------------|-----------|----------|
|                 |                     | CT                 | CT Change | % Change | CT            | CT Change | % Change | CT               | CT Change | % Change | CT         | CT Change | % Change |
| Baseline (none) | -20°C               | 29.44              |           |          | 29.58         |           |          | 30.30            |           |          | 30.40      |           |          |
| 8 Hours         | 4°C                 | 28.40              | 1.04      | 3.53     | 26.81         | 2.77      | 9.36     | 30.28            | 0.02      | 0.07     | 30.33      | 0.07      | 0.23     |
|                 | 20°C                | 29.12              | 0.32      | 1.09     | 29.51         | 0.07      | 0.24     | 29.86            | 0.44      | 1.45     | 29.82      | 0.58      | 1.91     |
|                 | 27°C                | 29.56              | -0.12     | -0.41    | 29.91         | -0.33     | -1.12    | 29.76            | 0.54      | 1.78     | 30.25      | 0.15      | 0.49     |
|                 | 35°C                | 30.31              | -0.87     | -2.96    | 29.53         | 0.05      | 0.17     | 30.52            | -0.22     | -0.73    | 29.89      | 0.51      | 1.68     |
| 24 Hour         | 4°C                 | 29.52              | -0.08     | -0.27    | 29.64         | -0.06     | -0.20    | 29.43            | 0.87      | 2.87     | 29.39      | 1.01      | 3.32     |
|                 | 20°C                | 29.54              | -0.10     | -0.34    | 29.41         | 0.17      | 0.57     | 29.64            | 0.66      | 2.18     | 29.86      | 0.54      | 1.78     |
|                 | 27°C                | 29.66              | -0.22     | -0.75    | 29.16         | 0.42      | 1.42     | 29.93            | 0.37      | 1.22     | 29.64      | 0.76      | 2.50     |
|                 | 35°C                | 28.89              | 0.55      | 1.87     | 29.74         | -0.16     | -0.54    | 28.43            | 1.87      | 6.17     | 30.23      | 0.17      | 0.56     |
| 48 Hour         | 4°C                 | 28.64              | 0.80      | 2.72     | 27.94         | 1.64      | 5.54     | 29.79            | 0.51      | 1.68     | 29.36      | 1.04      | 3.42     |
|                 | 20°C                | 28.88              | 0.56      | 1.90     | 28.27         | 1.31      | 4.43     | 29.52            | 0.78      | 2.57     | 29.80      | 0.60      | 1.97     |
|                 | 27°C                | 29.62              | -0.18     | -0.61    | 29.33         | 0.25      | 0.85     | 29.95            | 0.35      | 1.16     | 29.11      | 1.29      | 4.24     |
|                 | 35°C                | 30.19              | -0.75     | -2.55    | 30.60         | -1.02     | -3.45    | 29.96            | 0.34      | 1.12     | 30.71      | -0.31     | -1.02    |
| 72 Hour         | 4°C                 | 29.83              | -0.39     | -1.32    | 28.40         | 1.18      | 3.99     | 29.66            | 0.64      | 2.11     | 30.65      | -0.25     | -0.82    |
|                 | 20°C                | 29.80              | -0.36     | -1.22    | 28.78         | 0.80      | 2.70     | 29.60            | 0.70      | 2.31     | 29.72      | 0.68      | 2.24     |
|                 | 27°C                | 29.66              | -0.22     | -0.75    | 29.73         | -0.15     | -0.51    | 30.50            | -0.20     | -0.66    | 30.07      | 0.33      | 1.09     |
|                 | 35°C                | 29.30              | 0.14      | 0.48     | 29.72         | -0.14     | -0.47    | 29.86            | 0.44      | 1.45     | 30.42      | -0.02     | -0.07    |
| 168 Hour        | 4°C                 | 29.42              | 0.02      | 0.07     | 29.60         | -0.02     | -0.07    | 30.58            | -0.28     | -0.92    | 31.21      | -0.81     | -2.66    |
|                 | 20°C                | 30.27              | -0.83     | -2.82    | 29.82         | -0.24     | -0.81    | 30.83            | -0.53     | -1.75    | 31.70      | -1.30     | -4.28    |
|                 | 27°C                | 29.96              | -0.52     | -1.77    | 30.55         | -0.97     | -3.28    | 30.95            | -0.65     | -2.15    | 29.95      | 0.45      | 1.48     |
|                 | 35°C                | 30.22              | -0.78     | -2.65    | 31.34         | -1.76     | -5.95    | 30.42            | -0.12     | -0.40    | 30.77      | -0.37     | -1.22    |
| 30 Days         | 4°C                 | 31.72              | -2.28     | -7.74    | 32.70         | -3.12     | -10.55   | 31.59            | -1.29     | -4.26    | 31.49      | -1.09     | -3.59    |
|                 | 20°C                | 31.91              | -2.47     | -8.39    | 30.81         | -1.23     | -4.16    | 32.24            | -1.94     | -6.40    | 31.50      | -1.10     | -3.62    |
|                 | 27°C                | 31.91              | -2.47     | -8.39    | 32.84         | -3.26     | -11.02   | 32.59            | -2.29     | -7.56    | 31.73      | -1.33     | -4.38    |
|                 | 35°C                | 33.75              | -4.31     | -14.64   | 33.26         | -3.68     | -12.44   | 31.83            | -1.53     | -5.05    | 33.15      | -2.75     | -9.05    |

CT Change: Baseline Temp CT - Experimental Temp CT

% Change: (Baseline Temp CT - Experimental Temp CT)/Baseline Temp CT\*100

Note: If the CP Change and % CP are negative values, the CP value INCREASED from the Baseline

Highlighted cells represent >1 absolute value CT change or a change of >5%.
